# Supplementary material for: Age-related individual-specific subspace of autism spectrum disorder based on common orthogonal basis extraction algorithm improves the accuracy of clinical symptoms prediction
Source: Research Square preprint supplement (doi:10.21203/rs.3.rs-8832166/v1), 2026-02-24
Supplement: Supplementary file 1 [file a7ea26ba0867e18a1d08b1f7.docx]

**Supplementary Materials**

# Age-related individual-specific subspace of autism spectrum disorder based on common orthogonal basis extraction algorithm improves the accuracy of clinical symptoms prediction

Tingting Luo1,2,3†, Jie Zhang4†, Manxue Zhang1,2, Lei Li1,2, Shengnan Zhao1,2, Zhaozhi Yang1,2, Yuchu Jiang1,2; Bin Liu4*; Yi Huang1,2*

1 Mental Health Center, West China Hospital, Sichuan University, Chengdu, Sichuan 610041, China.

2 Child Mental Health Center, West China Hospital, Sichuan University, Chengdu, Sichuan 610041, China.

3 Mental Health Education Center, Student Affairs Office, Southwest Minzu University, Chengdu, Sichuan 610225, China.

4 School of Statistics and Data Science, Southwestern University of Finance and Economics, Chengdu 611130, China.

*Correspondence:

Bin Liu, PhD, Email: [liubin@swufe.edu.cn](mailto:liubin@swufe.edu.cn)

Yi Huang, PhD, Email: [huangyu@scu.edu.cn](mailto:huangyu@scu.edu.cn)

†These authors have contributed equally to this work:

Tingting Luo, Jie Zhang

**Authors Email:**

Tingting Luo: [luott1991@163.com](mailto:luott1991@163.com)

Jie Zhang: [jiezhang157@outlook.com](mailto:jiezhang157@outlook.com)

Manxue Zhang: [447458306@qq.com](mailto:447458306@qq.com)

Lei Li: [LiLei237660@163.com](mailto:LiLei237660@163.com)

Shengnan Zhao: [1207383098@qq.com](mailto:1207383098@qq.com)

Zhaozhi Yang: [yang_zhaozhi@outlook.com](mailto:yang_zhaozhi@outlook.com)

Yuchu Jiang: [jiangyuchu0307@163.com](mailto:jiangyuchu0307@163.com)

# Methods

## Participants

Magnetic resonance imaging (MRI) data and phenotypic data from 3 sites with the largest participant numbers were downloaded from the autism brain imaging data exchange (ABIDE) datasets (https://fcon_1000.projects.nitrc.org/indi/abide/)[1, 2]. We selected three identical sites from ABIDE I and ABIDE II respectively, where participant inclusion/exclusion criteria and MRI scanning parameters remained consistent. Finally, 437 participants (age range: 6-39 years; autism spectrum disorder (ASD) =208, typical development (TD) =229) were included in this study, including 226 from New York University (NYU; age range: 6-39; ASD=99, TD=127); 112 from University of California, Los Angeles (UCLA; age range: 7-17; ASD=59, TD=53); and 99 from University of Utah School of Medicine (USM; age range: 12-39; ASD=50, TD=49). Source information is provided in Table S1.

## Parameters of MRI Data Collection

NYU: MRI data were acquired using a 3T Siemens Allegra scanner. An anatomical T1-weighted image was acquired with a 3D magnetization prepared rapid acquisition gradient echo (MPRAGE) sequence: repetition time (TR) = 2530ms, echo time (TE) = 3.25ms, inversion time (TI) = 1100ms, slice thickness = 1.3mm, flip angle = 7°, filed of view (FOV) = 256 mm × 256mm and voxel size = 1.3mm × 1.0mm × 1.3mm. During the rs-fMRI scan, participants were asked to relax with their eyes open, while a white cross-hair against a black background was projected on a screen, using a 2D echo planar imaging (EPI) sequence with the following parameters: TR  =  2000ms, TE  =  15ms, flip angle  =  90°, FOV  =  192mm × 192mm, matrix size  =  80  ×  80, voxel size  =  3.0mm × 3.0mm × 4.0mm, slice thickness = 4.0mm, number of slices = 33, and number of volumes = 180.

UCLA: MRI data were acquired using a Simens Trio Tim scanner. The acquisition parameters for the T1-weighted images were as follows: TR= 2300ms, TE= 2.84ms，TI= 853ms，slice thickness = 1.2mm，flip angle =9°，FOV = 256 mm× 240mm and voxel size = 1.0 mm ×1.0 mm ×1.2mm. The acquisition parameters for the rs-fMRI images were as follows: TR = 3000ms, TE = 28ms, flip angle = 90°, slice thickness = 4.0mm, FOV= 192mm × 192mm, matrix size = 64 × 64, voxel size = 3.0mm × 3.0mm × 4.0mm, number of slices = 34, and number of volumes = 120.

USM: MRI data were acquired using a Simens Trio Tim scanner. The acquisition parameters for the T1-weighted images were as follows: TR = 2300ms, TE = 2.91ms, TI = 900ms, slice thickness = 1.20mm, flip angle = 9°, FOV = 256mm× 240mm, voxel size = 1.0 mm ×1.0 mm ×1.2mm. The acquisition parameters for the rs-fMRI images were as follows: TR= 2000ms，TE = 28ms，flip angle = 90°, slice thickness = 3.0mm, FOV = 220mm × 220mm, matrix size = 64 × 64, voxel size = 3.4mm × 3.4mm × 3.0mm, the number of slices = 40, and number of volumes = 240.

Validation dataset: MRI data of validation dataset were acquired using a 3T United Imaging scanner. The acquisition parameters for the anatomical T1-weighted images were as follows: TR = 8.5ms, TE = 3.1ms, TI = 1100ms, slice thickness = 0.8mm, flip angle = 8°, FOV = 240mm × 256mm, voxel size = 0.8mm × 0.8mm × 0.8mm. The acquisition parameters for the rs-fMRI were as follows: TR = 1000ms, TE = 30ms, flip angle = 60°, slice thickness = 2.5mm, FOV = 210mm × 210mm, voxel size = 2.5mm × 2.5mm × 2.5mm, matrix size = 84 × 84, the number of slices = 65, and the number of volumes = 500.

## Quality control

In the current study, participants with translational or rotational head motion higher than 3mm or 3° were excluded. A small number of participants were also excluded due to a lack of time points (the number of excluded participants were summarized in Table S2).

## Common Orthogonal Basis Extraction

Altered functional connectivity (AFC) matrices computed above were stratified into four age groups: 6–11, 12–17, 18–25, and 26–39 years. We applied the common orthogonal basis extraction (COBE) [3, 4] algorithm to these age-stratified AFC matrices. Originally designed for multiblock data (i.e., collections of matrices) decomposition, COBE separates shared and block-specific subspaces[4]. In this study, we demarcated age groups as experimental "blocks". This allowed the COBE algorithm to extract both a shared subspace across all groups and an age-related subspace that captures the connectivity changes specific to each cohort. The illustration of COBE sees Fig. S1.

For individual with ASD, we extracted the lower triangular part (excluding the diagonal) of their 160 × 160 AFC matrix, then vectorized the elements in column-major order to form a 12,720 × 1 column vector (where 12,720 = 159 × 160 / 2). For each of the four age groups, this procedure yielded an aggregated 12,720 × N AFC matrix, where N represents the number of ASD participants in that age group. We denote these four age-stratified AFC matrices as the matrix collection {Y₁, Y₂, Y₃, Y₄}. . For Yₙ, we seek:

（1）

where columns of represent the latent variables in and denotes the corresponding coefficient.

COBE algorithm performs a simultaneous analysis of the set , at this point, can be decomposed into two parts:

（2）

where . We assume that is the common component of the matrix set, that is, the component shared by patients in the four age groups, and is a specific feature of ASD in different age groups. This leads us to have the following decomposition form for the set of matrices:

(3)

where and are the partitions of the coefficients corresponding to and . In this way, the matrix for each age group can be expressed as the sum of two matrices, as shown in Fig. S1. For each age group, the decomposition framework could be represented as individual-shared subspace add individual-specific subspace. Code for COBE is publicly available: <https://github.com/ClinicalBrainLab/OCD_Cerebellar-Visual-Community>.

## Extract individual-shared components

The number of common components (C) spanning the individual-shared subspace is a user-specified parameter. Guided by previous studies[5], we assumed that common components of AFC estimated from different age group were stable and similar. In other words, the shared components extracted using the COBE method from the full set of four age groups and from any arbitrary subset of three age groups should be highly similar. We employed the Hungarian matching algorithm, which could achieve optimal assignment of combined components, to compute the maximum correlation between the components of the shared components extracted as described above. After obtaining the optimal match, the correlations were averaged 1000 times, resulting in an average similarity between each pair of estimates with C from 2 to 10.

When the shared component is determined, the coefficient can be calculated:

(4)

Finally, we can determine the individual-shared subspaces () that are independent of age and individual-specific subspaces () that are dependent on age.

# Results

## Extract three individual-shared components

We found that the estimations were robust when common component (C) is three, with the highest similarity 0.8 (Fig. S2). Thus, we focused on three common components in subsequent analyses.

## Validation analysis results

In an independent dataset, we computed the L2-norm of brain networks within the individual-specific subspace, where the L2-norm represents the "strength" of connectivity of brain network. Correlations between the L2-norm of brain networks in individual-specific subspace and behaviors were calculated separately for each age group. The results shows in Fig. S3: In “2-5 years” group, no significant correlations was observed (*p* >0.05); in “6-11 years” group, significant negative correlations were observed between social and L2-norm of FPN-CON (r = -0.31, *p* = 0.03), FPN-SMN (r = -0.32, *p* = 0.025) and FPN-ON (r = -0.28, *p* = 0.048) inter-network connectivity, and L2-norm of ON intra-network connectivity (r = -0.34, *p* = 0.018); In “12-17 years” group, significant positive correlations were found between communication FPN-SMN (r = 0.55, *p* = 0.017), FPN-ON (r = 0.58, *p* = 0.013)and CON-ON (r = 0.65, *p* = 0.005), significant positive correlations were found between social and DMN intra-network connectivity, significant negative correlations were observed between RRB and CON-ON connectivity (r = 0.51, *p* = 0.03).

**Table S1** The source information of the participants included in the ABIDE database.

| Sites | Age Range (years) | N | ASD | TD |
| --- | --- | --- | --- | --- |
| NYU: ABIDE I | 6-39 | 168 | 67 | 101 |
| NYU: ABIDE II | 6-34 | 58 | 32 | 26 |
| NYU Merged | 6-39 | 226 | 99 | 127 |
| UCLA: ABIDE I | 8-17 | 82 | 44 | 38 |
| UCLA: ABIDE II | 7-15 | 30 | 15 | 15 |
| UCLA Merged | 7-17 | 112 | 59 | 53 |
| USM: ABIDE I | 12-38 | 76 | 40 | 36 |
| USM: ABIDE II | 12-39 | 23 | 10 | 13 |
| USM Merged | 12-39 | 99 | 50 | 49 |

Abbreviations: NYU, New York University; UCLA, University of California, Los Angeles; USM, University of Utah School of Medicine

**Table S2** Number of excluded participants due to excessive head motion and missing time points.

| Sites | Source | Group | Excessive head motion | Lack of time points | Resulting sample |
| --- | --- | --- | --- | --- | --- |
| NYU | ABIDE I | ASD | 6 | 4 | 67 |
| TD | 4 | 0 | 101 |
| ABIDE II (NYU_1) | ASD | 4 | 0 | 32 |
| TD | 1 | 0 | 26 |
| UCLA | ABIDE I | ASD | 11 | 1 | 44 |
| TD | 4 | 4 | 38 |
| ABIDE II | ASD | 1 | 0 | 15 |
| TD | 1 | 0 | 15 |
| USM | ABIDE I | ASD | 11 | 1 | 40 |
| TD | 5 | 0 | 36 |
| ABIDE II | ASD | 7 | 0 | 10 |
| TD | 3 | 0 | 13 |
| Total |  |  | 58 | 10 | 437 |

Abbreviations: NYU, New York University; UCLA, University of California, Los Angeles; USM, University of Utah School of Medicine; ASD, autism spectrum disorder; TD, typical development


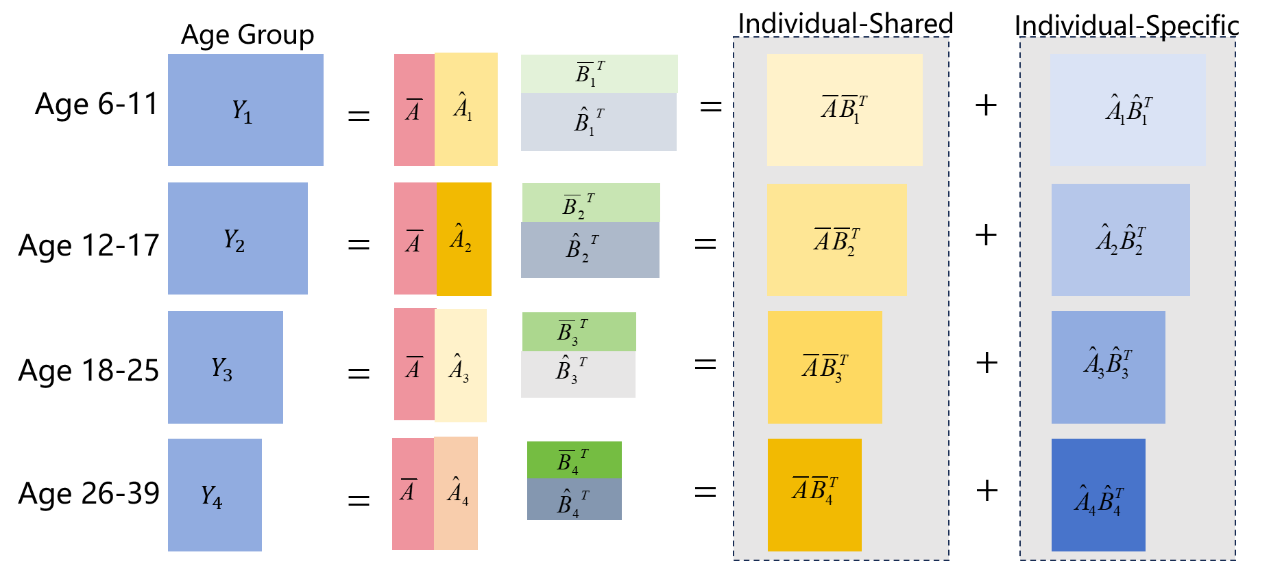


**Fig. S1** Illustration of common orthogonal basis extraction (COBE). COBE was applied to AFC matrices from four age groups. The matrix denotes the common components spanning the individual-shared space. The number of common components (the number of columns of matrix) is a user-defined parameter.


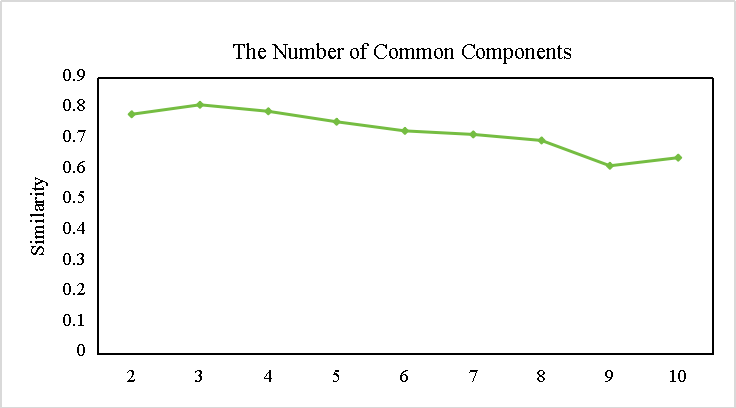


**Fig. S2** Similarity between the final estimation and decomposition.


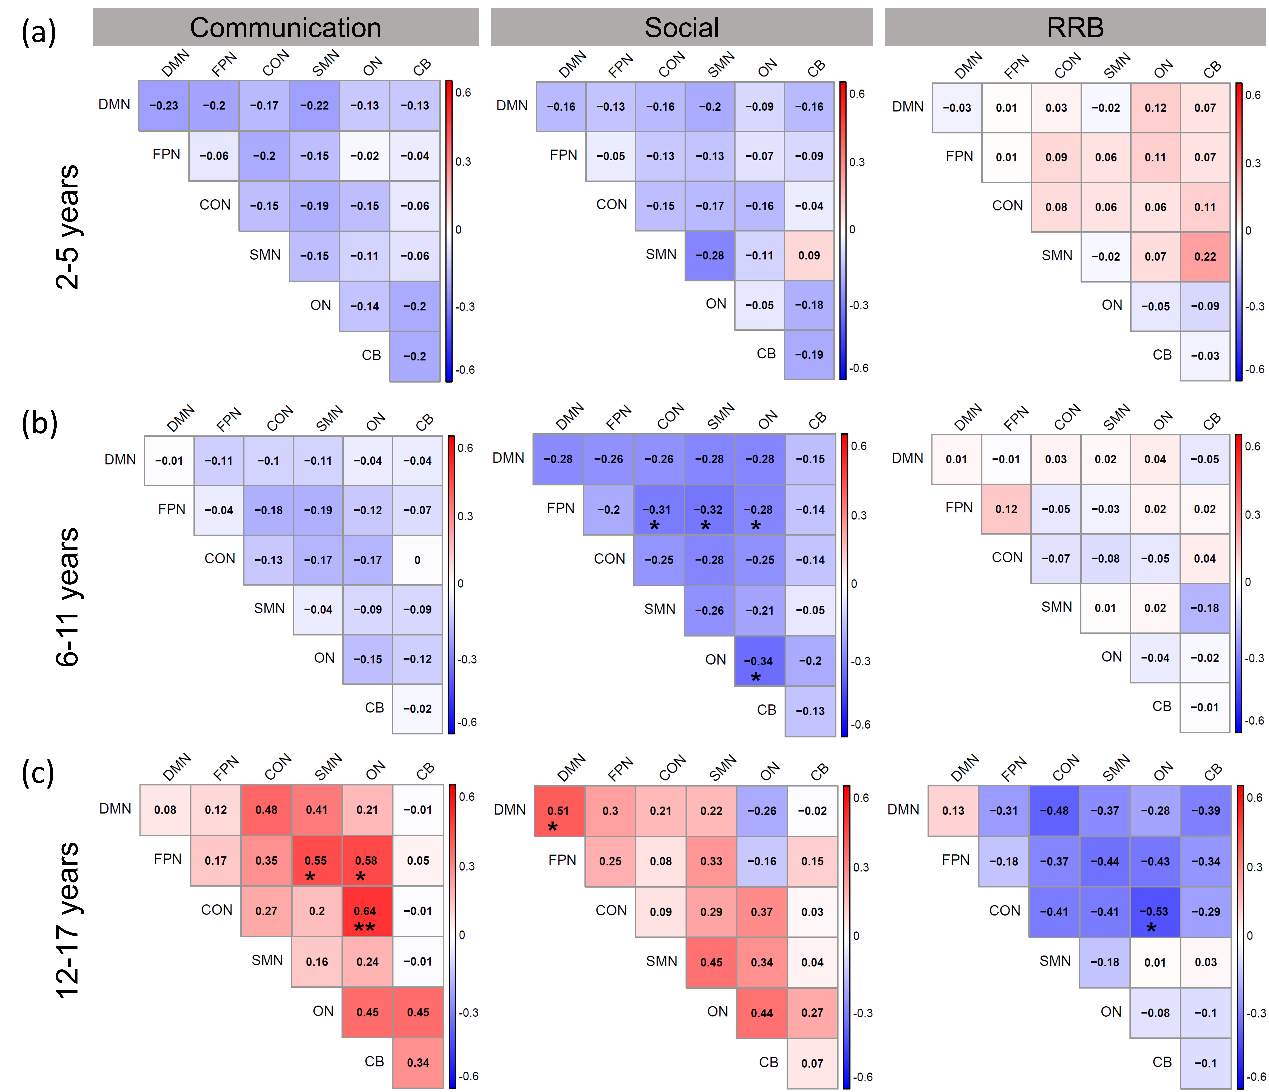


**Fig. S3** Relationships between the L2-norm of brain networks in the individual-specific subspace and behaviors in validation dataset. **(a)**: In the group of aged 2-5 years, the correlations between the L2-norm of the individual-specific subspace and communication, social and RRB; **(b)**: In the group of aged 6-11 years, the correlations between the L2-norm of the individual-specific subspace and communication, social and RRB; **(c)**: In the group of aged 12-17 years, the correlations between the L2-norm of the individual-specific subspace and communication, social and RRB. *represents corrected *p* < 0.05, ***p* < 0.01. Abbreviations: ADOS, Autism Diagnostic Observation Schedule; AFC, altered functional connectivity; RRB, restricted and repetitive behavior; CON, cingulo-opercular network; DMN, default mode network; FPN, frontoparietal network; ON, occipital network; RRB, restricted, repetitive behavior; SMN, sensorimotor network; CB, cerebellum.

# Reference

1. Di Martino, A.; Yan, C. G.; Li, Q., et al., The autism brain imaging data exchange: towards a large-scale evaluation of the intrinsic brain architecture in autism [J]. Molecular psychiatry, 2014, 19 (6): 659-67.

2. Di Martino, A.; O'Connor, D.; Chen, B., et al., Enhancing studies of the connectome in autism using the autism brain imaging data exchange II [J]. Scientific data, 2017, 4: 170010.

3. Zhou, G.; Zhao, Q.; Zhang, Y., et al., Linked Component Analysis From Matrices to High-Order Tensors: Applications to Biomedical Data [J]. Proceedings of the IEEE, 2016, 104 (2): 310-331.

4. Zhou, G.; Cichocki, A.; Zhang, Y., et al., Group Component Analysis for Multiblock Data: Common and Individual Feature Extraction [J]. IEEE transactions on neural networks and learning systems, 2016, 27 (11): 2426-2439.

5. Shan, X.; Uddin, L. Q.; Ma, R., et al., Disentangling the Individual-Shared and Individual-Specific Subspace of Altered Brain Functional Connectivity in Autism Spectrum Disorder [J]. Biological psychiatry, 2024, 95 (9): 870-880.
